# Supplementary material for: Analytic, Preanalytic, and Clinical Validation of p53 IHC for Detection of TP53 Missense Mutation in Prostate Cancer
Source: Oxford University Press journal article supplement (doi:10.1158/1078-0432.ccr-17-0257), 2017-04-26
Supplement: 10780432ccr170257-sup-178182_2_supp_3935196_znbnd8.docx [file 10780432ccr170257-sup-178182_2_supp_3935196_znbnd8.docx]

**Supplementary Table S2**: *TP53* mutations in formalin fixed paraffin embedded cell lines stratified by immunohistochemistry (IHC) result. **Bolded** results indicate discordant samples.

| **FFPE cell lines** | | |
| --- | --- | --- |
| **p53 nuclear accumulation by IHC** | **Absence of detectable p53 by IHC** | **Normal p53 expression by IHC** |
| p.L145R | p.S90fsX33 | **p.R306*** |
| p.P152L | p.C135fs | **p.E336*** |
| p.V157F | p.A138fs |  |
| p.V274F | p.P191fs |  |
| p.R175H | p.E204* |  |
| p.R175L | p.R213* |  |
| p.H179R | p.V225_splice |  |
| p.L194F | homozygous deletion |  |
| p.S241F |  |  |
| p.G245S |  |  |
| p.M246I |  |  |
| p.R248L |  |  |
| p.R248Q |  |  |
| p.R249S |  |  |
| p.L264R |  |  |
| p.G266E |  |  |
| p.R273H |  |  |
| p.R280K |  |  |
| p.E285K |  |  |
