# Supplementary material for: Analytic, Preanalytic, and Clinical Validation of p53 IHC for Detection of TP53 Missense Mutation in Prostate Cancer
Source: Oxford University Press journal article supplement (doi:10.1158/1078-0432.ccr-17-0257), 2017-04-26
Supplement: 10780432ccr170257-sup-178182_2_supp_3935201_hnbndq.docx [file 10780432ccr170257-sup-178182_2_supp_3935201_hnbndq.docx]

| **Variables** | **N (%)** |
| --- | --- |
|
| **No. patients (%)** | 195 (100%) |
|  |  |
| **Race, n (%)** |  |
| Caucasian | 175 (89.7%) |
| African-American | 17 (8.7%) |
| Other | 2 (1.0%) |
| Unknown | 1 (0.5%) |
| **Patient age, yr** |  |
| Median (Q1, Q3) | 59 (56-64) |
| **Preoperative PSA (ng/mL)** |  |
| Median (Q1, Q3) | 8.8 (6-14.9) |
| **RP Gleason Score, n (%)** |  |
| ≤3+4 | 82 (42.1%) |
| 4+3 | 29 (14.9%) |
| 8 | 22 (11.3%) |
| ≥9 | 62 (31.8%) |
| **Extraprostatic Extension, n (%)** |  |
|  | 152 (77.9%) |
| **Seminal Vesicle Invasion, n (%)** |  |
|  | 60 (30.8%) |
| **Positive Surgical Margins, n (%)** |  |
|  | 73 (37.4%) |
| **Lymph Node Invasion, n (%)** |  |
|  | 48 (24.6%) |
| **Follow-up of censored patients post-BCR, yr** |  |
| Median (Q1, Q3) | 5 (3-8) |

**Supplementary Table S5. Demographic and clinical characteristics of eligible patients undergoing radical prostatectomy in post-biochemical recurrence cohort**
