# Supplementary material for: Analytic, Preanalytic, and Clinical Validation of p53 IHC for Detection of TP53 Missense Mutation in Prostate Cancer
Source: Oxford University Press journal article supplement (doi:10.1158/1078-0432.ccr-17-0257), 2017-04-26
Supplement: 10780432ccr170257-sup-178182_2_supp_3935203_9nbnds.docx [file 10780432ccr170257-sup-178182_2_supp_3935203_9nbnds.docx]

**Supplementary Table S3**: *TP53* mutations in formalin fixed paraffin embedded primary and metastatic prostate tumors stratified by immunohistochemistry (IHC) result. **Bolded** results indicate discordant samples. Red font indicates disruptive mutations by Poeta et al criteria (reference 42).

| **FFPE prostate tumors** | |
| --- | --- |
| **p53 nuclear accumulation by IHC** | **Normal p53 expression by IHC** |
| p.R110L | p.S166* |
| p.K131N | p.P190fs*56 |
| p.F134L | p.Q192fs (del 14) |
| p.V157A | p.209fs |
| p.R158H | p.N239fs |
| p.A159V | **p.R267W,** G226D, M160I, E349K, E339K, A129T, E11K and V10I (single sample) |
| p.M169R | **p.R282W¥** |
| p.R175H | p.302fs |
| p.R196P | p.R342* |
| **p.V203_D207del15** | homozygous deletion |
| p.S215R |
| p.Y220C |
| p.S241A |
| p.C242F |
| p.G244D |
| p.G245S |
| p.R248L |
| p.R248Q |
| **p.I255delI** |
| p.G266R |
| p.R273C |
| p.A276E |
| p.E286G |
| **p.R282W¥** |
| p.R333H, R273H, G245S, V197M (single sample) |
|  |

**¥** The p. R282W mutation was detected in two different samples but only showed p53 nuclear accumulation by IHC in one sample.
